# Supplementary material
Source: PubMed Central journal article supplement (PMC8384030)
Supplement: 41586_2015_BFnature14962_MOESM16_ESM.pdf [file 41586_2015_BFnature14962_MOESM16_ESM.pdf]

## The UCLEB Consortium

Yoav Ben-Shlomo<sup>1</sup>, Carolina Borges<sup>2</sup>, Juan-Pablo Casas<sup>3</sup>, Amy Cassidy<sup>3</sup>, Pimphen Charoen<sup>3,4</sup>, Nishi Chaturvedi<sup>5</sup>, Jackie Cooper<sup>6</sup>, Caroline Dale<sup>3</sup>, Ian Day<sup>7</sup>, Maneka De Silva<sup>7</sup>, Fotios Drenos<sup>6</sup>, Frank Dudbridge<sup>3</sup>, Jorgen Engmann<sup>2</sup>, Ghazaleh Fatemifar<sup>3</sup>, Chris Finan<sup>8</sup>, Victoria Garfield<sup>9</sup>, Tom Gaunt<sup>7</sup>, Alex Gentry-Maharaj<sup>10</sup>, Claudia Giambartolomei<sup>11</sup>, Anna Guyatt<sup>7</sup>, Aroon Hingorani<sup>8</sup>, Alun Hughes<sup>5</sup>, Steve Humphries<sup>6</sup>, Elina Hypponen<sup>12</sup>, Barbara Jefferis<sup>13</sup>, Mika Kivimaki<sup>14</sup>, Felix Kruger<sup>2</sup>, Diana Kuh<sup>15</sup>, Meena Kumari<sup>16</sup>, Claudia Langenberg<sup>9,17</sup>, Debbie Lawlor<sup>7</sup>, Stela Mclachlan<sup>18</sup>, Usha Menon<sup>10</sup>, Richard Morris<sup>1</sup>, Teri North<sup>7</sup>, Vincent Plagnol<sup>11</sup>, Christine Power<sup>12</sup>, Anna Price<sup>18</sup>, Jackie Price<sup>18</sup>, Floriaan Schmidt<sup>2</sup>, Tina Shah<sup>2</sup>, Reecha Sofat<sup>19</sup>, Daniel Swerdlow<sup>2</sup>, Philippa Talmud<sup>6</sup>, Therese Tillin<sup>5</sup>, Ann Walker<sup>6</sup>, Goya Wanamethee<sup>13</sup>, Peter Whincup<sup>20</sup>, Jon White<sup>11</sup>, John Whittaker<sup>21</sup>, Andrew Wong<sup>15</sup>, Delilah Zabaneh<sup>11</sup>

<sup>1</sup>School of Social and Community Medicine, University of Bristol, Bristol, UK

<sup>2</sup>Genetic Epidemiology Group, Institute of Cardiovascular Science, University College London, UK

<sup>3</sup>Dept Non-communicable Disease Epidemiology, London School of Hygiene and Tropical Medicine, UK

<sup>4</sup>Department of Tropical Hygiene, Faculty of Tropical Medicine, Mahidol University, Thailand

<sup>5</sup>Cardiometabolic Phenotyping Group, Institute of Cardiovascular Science, University College London, UK

<sup>6</sup>Centre for Cardiovascular Genetics, Dept. of Medicine, University College London, UK

<sup>7</sup>MRC Centre for Causal Analyses in Translational Epidemiology, School of Social and Community Medicine, University of Bristol, UK

<sup>8</sup>Institute of Cardiovascular Science, University College London, UK

<sup>9</sup>Department of Epidemiology & Public Health, UCL Institute of Epidemiology & Health Care, University College London, UK

<sup>10</sup>Institute for Women's Health, Faculty of Population Health Sciences, University College London, UK

<sup>11</sup>University College London Genetics Institute, Department of Genetics, Environment and Evolution, London, UK

<sup>12</sup>MRC Centre of Epidemiology for Child Health, Department of Population Health Sciences, UCL Institute of Child Health, University College London, London, UK

<sup>13</sup>Dept Primary Care & Population Health, University College London, UK

<sup>14</sup>Department of Epidemiology and Public Health, UCL Institute of Epidemiology and Health Care, University College London, UK

<sup>15</sup>MRC Unit for Lifelong Health and Ageing, London, UK

<sup>16</sup>Institute for Social and Economic Research, University of Essex

<sup>17</sup>MRC Epidemiology Unit, University of Cambridge School of Clinical Medicine, Institute of Metabolic Science, Cambridge Biomedical Campus, UK

<sup>18</sup>Centre for Population Health Sciences, The Usher Institute of Population Health Sciences and Informatics, University of Edinburgh, UK

<sup>19</sup>Centre for Clinical Pharmacology, University College London, London, UK

<sup>20</sup>Population Health Research Institute, St George's, University of London, UK

<sup>21</sup>Genetics Division, Research and Development, GlaxoSmithKline, Harlow, UK
